# Supplementary material
Source: PubMed Central journal article supplement (PMC2000445)

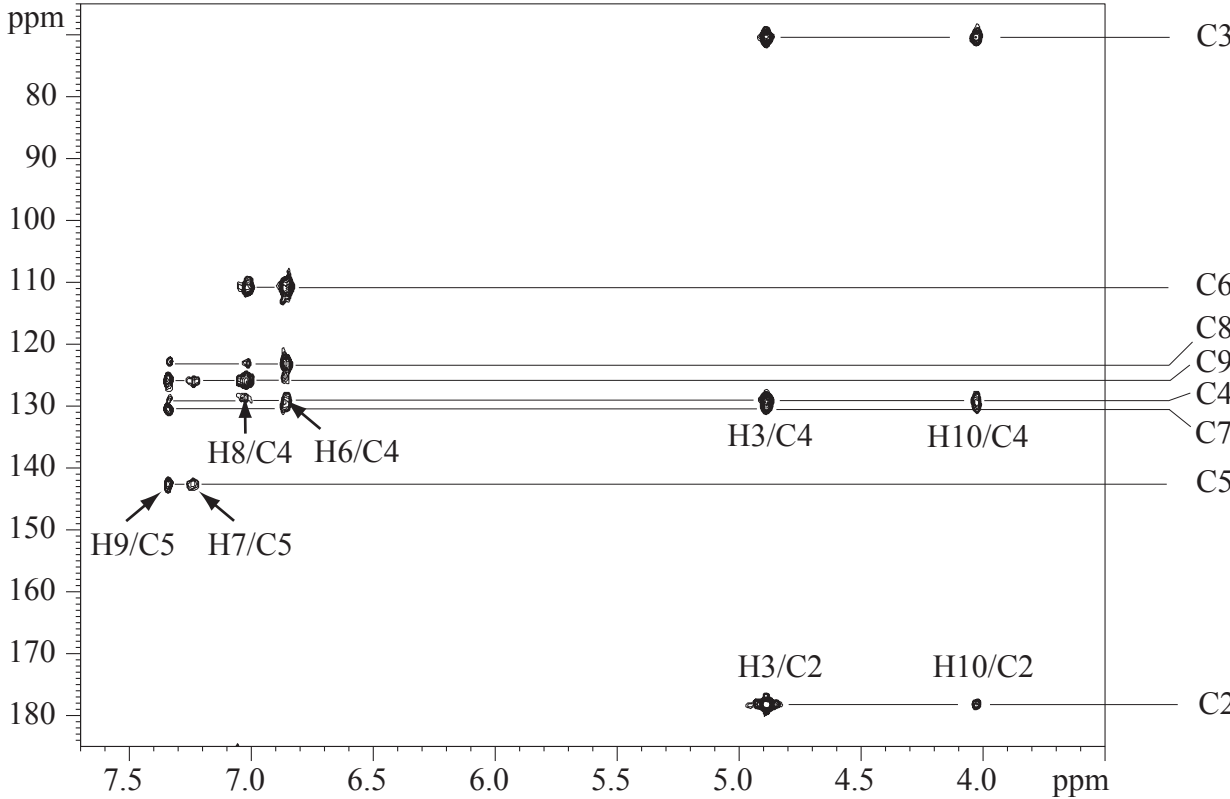

Supplement: pnas_0700782104_1.pdf [file pnas_0700782104_1.pdf]

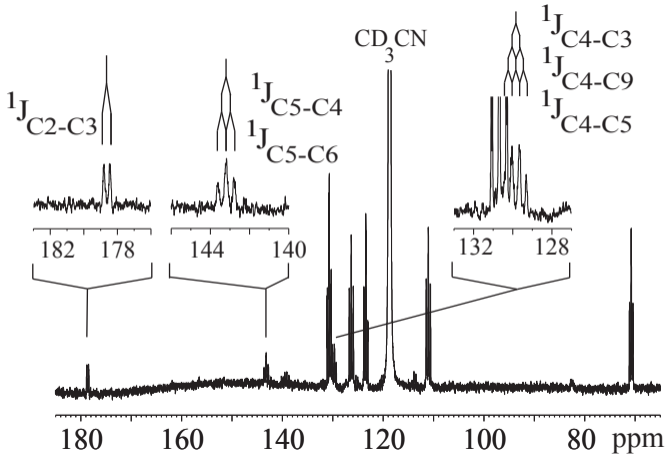

Supplement: pnas_0700782104_2.pdf [file pnas_0700782104_2.pdf]

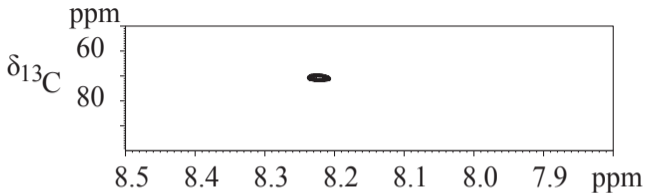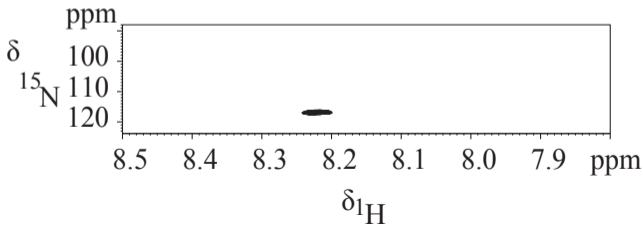

Supplement: pnas_0700782104_3.pdf [file pnas_0700782104_3.pdf]

**A**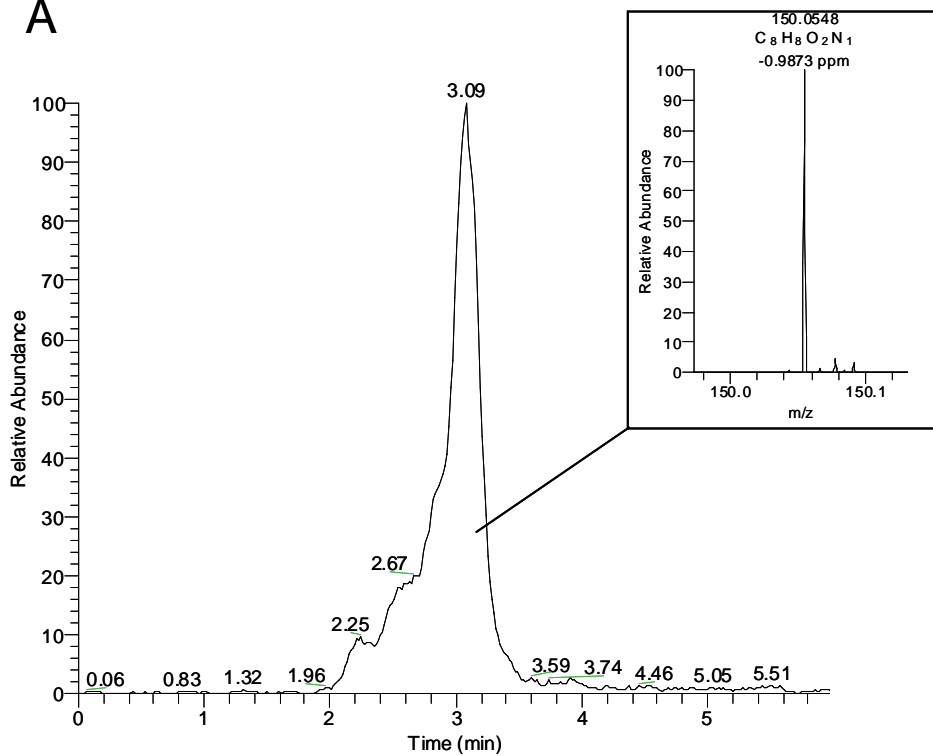**B**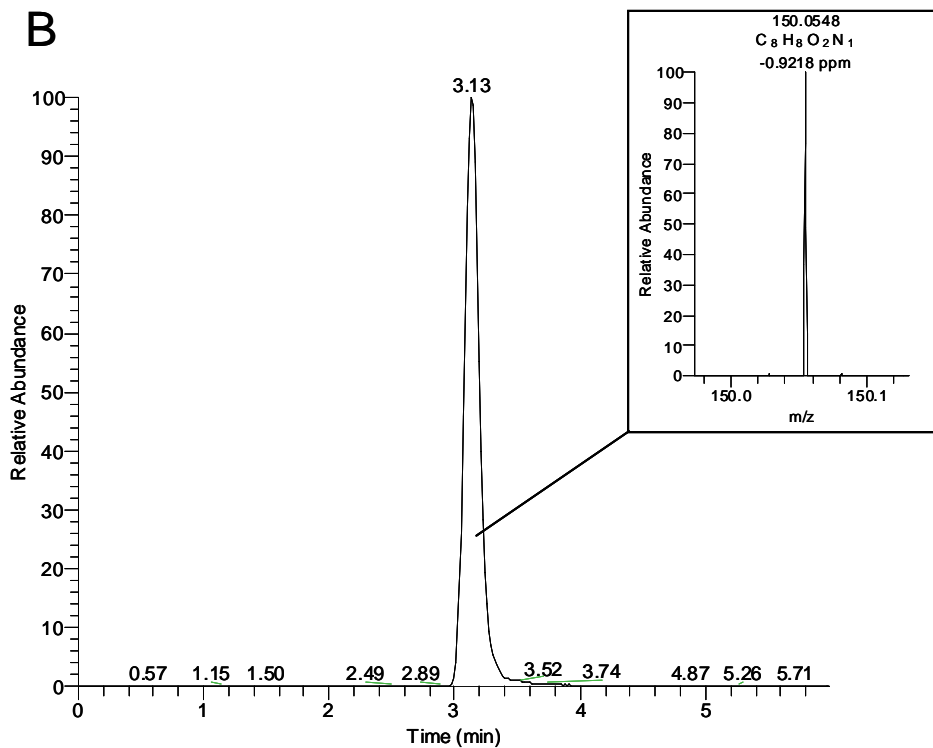

Supplement: pnas_0700782104_4.pdf [file pnas_0700782104_4.pdf]
